# Supplementary material
Source: PubMed Central journal article supplement (PMC9878469)
Supplement: PRO-32-e4555-s002.pdf [file PRO-32-e4555-s002.pdf]

# Supplementary information

## **QuoteTarget: A sequence-based transformer protein language model to identify potentially druggable protein targets**

Jiaxiao Chen<sup>1</sup>, Zhonghui Gu<sup>2</sup>, Youjun Xu<sup>3</sup>, Minghua Deng<sup>1,4,5</sup>, Luhua Lai<sup>1,2,6,7</sup>,

Jianfeng Pei<sup>1,7\*</sup>

<sup>1</sup>Center for Quantitative Biology, Academy for Advanced Interdisciplinary Studies, Peking University, Beijing, 100871, China

<sup>2</sup>Peking-Tsinghua Center for Life Sciences, Academy for Advanced Interdisciplinary Studies, Peking University, Beijing, 100871, China

<sup>3</sup>Infinite Intelligence Pharma, Beijing 100083, China

<sup>4</sup>School of Mathematical Sciences, Peking University, Beijing 100871, China

<sup>5</sup>Center for Statistical Science, Peking University, Beijing 100871, China

<sup>6</sup>BNLMS, College of Chemistry and Molecular Engineering, Peking University, Beijing, 100871, China

<sup>7</sup>Research Unit of Drug Design Method, Chinese Academy of Medical Sciences (2021RU014), Beijing 100871, China

### **\*Correspondence:**

Jianfeng Pei, Center for Quantitative Biology, Academy for Advanced Interdisciplinary Studies, Peking University, Beijing, 100871, China.

Email: [jfpei@pku.edu.cn](mailto:jfpei@pku.edu.cn)

Supplementary Table 1: Classification results on all drug target dataset with the same number of positive and negative samples

|                            | <b>Dataset</b>  | <b>Acc</b> | <b>Precision</b> | <b>F1</b> | <b>Mcc</b> | <b>Sensitivity</b> | <b>Specificity</b> |
|----------------------------|-----------------|------------|------------------|-----------|------------|--------------------|--------------------|
| 5-fold<br>cross-validation | All-Pfam        | 0.95±0.01  | 0.96±0.01        | 0.94±0.01 | 0.89±0.01  | 0.93±0.01          | 0.97±0.01          |
|                            | All-Evalue0.001 | 0.95±0.00  | 0.97±0.01        | 0.94±0.00 | 0.89±0.00  | 0.92±0.01          | 0.97±0.01          |
|                            | All-Evalue1     | 0.95±0.00  | 0.97±0.01        | 0.95±0.00 | 0.90±0.01  | 0.93±0.01          | 0.97±0.01          |
|                            | All-Evalue10    | 0.94±0.00  | 0.96±0.01        | 0.95±0.00 | 0.89±0.00  | 0.94±0.01          | 0.95±0.01          |
| External Test              | All-Pfam        | 0.94±0.00  | 0.96±0.01        | 0.94±0.00 | 0.88±0.01  | 0.92±0.01          | 0.97±0.01          |
|                            | All-Evalue0.001 | 0.94±0.00  | 0.97±0.00        | 0.94±0.00 | 0.89±0.00  | 0.92±0.00          | 0.97±0.00          |
|                            | All-Evalue1     | 0.94±0.00  | 0.95±0.01        | 0.94±0.00 | 0.88±0.01  | 0.92±0.00          | 0.95±0.01          |
|                            | All-Evalue10    | 0.94±0.00  | 0.95±0.01        | 0.95±0.00 | 0.89±0.00  | 0.94±0.01          | 0.94±0.01          |

The values in the table are the mean values and standard deviation are from the 5-fold cross-validation.

Abbreviations: Acc, accuracy; F1, F1-score; Mcc, Matthews correlation coefficient.

Supplementary Table 2: Classification results on FDA approved drug target dataset with the same number of positive and negative samples

|                            | <b>Dataset</b>  | <b>Acc</b> | <b>Precision</b> | <b>F1</b> | <b>Mcc</b> | <b>Sensitivity</b> | <b>Specificity</b> |
|----------------------------|-----------------|------------|------------------|-----------|------------|--------------------|--------------------|
| 5-fold<br>cross-validation | App-Pfam        | 0.90±0.01  | 0.92±0.01        | 0.91±0.00 | 0.81±0.01  | 0.89±0.01          | 0.92±0.02          |
|                            | App-Evalue0.001 | 0.91±0.01  | 0.93±0.01        | 0.90±0.01 | 0.81±0.01  | 0.88±0.02          | 0.93±0.01          |
|                            | App-Evalue1     | 0.91±0.01  | 0.91±0.01        | 0.91±0.01 | 0.82±0.02  | 0.91±0.01          | 0.91±0.01          |
|                            | App-Evalue10    | 0.90±0.01  | 0.90±0.02        | 0.91±0.01 | 0.81±0.02  | 0.92±0.00          | 0.89±0.02          |
| External Test              | App-Pfam        | 0.91±0.01  | 0.93±0.01        | 0.91±0.01 | 0.82±0.01  | 0.89±0.02          | 0.93±0.01          |
|                            | App-Evalue0.001 | 0.89±0.00  | 0.91±0.01        | 0.89±0.00 | 0.79±0.01  | 0.88±0.01          | 0.91±0.02          |
|                            | App-Evalue1     | 0.91±0.01  | 0.93±0.01        | 0.91±0.01 | 0.82±0.01  | 0.89±0.01          | 0.93±0.01          |
|                            | App-Evalue10    | 0.90±0.01  | 0.91±0.01        | 0.90±0.01 | 0.80±0.01  | 0.90±0.01          | 0.90±0.01          |

The values in the table are the mean values and standard deviation are from the 5-fold cross-validation.

Supplementary Table 3: Classification results with different classifiers on the All-Pfam dataset with ablation of ESM1b pretraining

|                  | Classifier | Acc       | Precision | F1        | Mcc       | Sensitivity | Specificity |
|------------------|------------|-----------|-----------|-----------|-----------|-------------|-------------|
| Cross-validation | DT         | 0.55±0.03 | 0.42±0.02 | 0.42±0.04 | 0.05±0.02 | 0.44±0.09   | 0.62±0.10   |
|                  | GNB        | 0.55±0.03 | 0.42±0.03 | 0.46±0.04 | 0.07±0.06 | 0.50±0.08   | 0.57±0.07   |
|                  | K-NEST     | 0.59±0.02 | 0.44±0.04 | 0.36±0.05 | 0.07±0.05 | 0.30±0.06   | 0.76±0.05   |
|                  | LR         | 0.62±0.01 | 0.00±0.00 | 0.00±0.00 | 0.00±0.00 | 0.00±0.00   | 1.00±0.00   |
|                  | RF         | 0.56±0.04 | 0.43±0.05 | 0.38±0.11 | 0.06±0.07 | 0.40±0.21   | 0.66±0.17   |
|                  | SVM        | 0.58±0.04 | 0.24±0.20 | 0.17±0.19 | 0.01±0.05 | 0.18±0.25   | 0.83±0.22   |
|                  | GCN        | 0.72±0.01 | 0.70±0.02 | 0.57±0.02 | 0.39±0.02 | 0.48±0.03   | 0.87±0.01   |
| External Test    | DT         | 0.55±0.03 | 0.40±0.01 | 0.41±0.04 | 0.05±0.01 | 0.43±0.10   | 0.62±0.10   |
|                  | GNB        | 0.53±0.02 | 0.39±0.02 | 0.43±0.04 | 0.04±0.03 | 0.48±0.09   | 0.56±0.07   |
|                  | K-NEST     | 0.58±0.02 | 0.42±0.02 | 0.35±0.04 | 0.06±0.03 | 0.30±0.06   | 0.75±0.05   |
|                  | LR         | 0.63±0.00 | 0.00±0.00 | 0.00±0.00 | 0.00±0.00 | 0.00±0.00   | 1.00±0.00   |
|                  | RF         | 0.55±0.04 | 0.40±0.02 | 0.36±0.11 | 0.04±0.06 | 0.39±0.20   | 0.65±0.17   |
|                  | SVM        | 0.59±0.05 | 0.22±0.19 | 0.17±0.18 | 0.01±0.03 | 0.18±0.25   | 0.83±0.23   |
|                  | GCN        | 0.72±0.00 | 0.66±0.02 | 0.56±0.01 | 0.37±0.00 | 0.49±0.03   | 0.85±0.02   |

The values in the table are the mean values and standard deviations are from the 5-fold cross-validation.

Abbreviations: DT, Decision Tree; GNB, Gaussian Naive Bayes; K-NEST, K-nearest Neighbor; LR, Logistic Regression; RF, Random Forest; SVM, Support Vector Machine; GCN, Graph Convolutional Network.

Supplementary Table 4: Classification results with different classifiers on the App-Pfam dataset with ablation of ESM1b pretraining

|                  | <b>Classifier</b> | <b>Acc</b> | <b>Precision</b> | <b>F1</b> | <b>Mcc</b> | <b>Sensitivity</b> | <b>Specificity</b> |
|------------------|-------------------|------------|------------------|-----------|------------|--------------------|--------------------|
| Cross-validation | DT                | 0.65±0.03  | 0.23±0.02        | 0.25±0.04 | 0.03±0.03  | 0.28±0.08          | 0.75±0.06          |
|                  | GNB               | 0.59±0.07  | 0.25±0.03        | 0.31±0.04 | 0.07±0.04  | 0.46±0.14          | 0.62±0.12          |
|                  | K-NEST            | 0.77±0.01  | 0.32±0.05        | 0.15±0.06 | 0.07±0.03  | 0.10±0.05          | 0.94±0.03          |
|                  | LR                | 0.79±0.01  | 0.00±0.00        | 0.00±0.00 | 0.00±0.00  | 0.00±0.00          | 1.00±0.00          |
|                  | RF                | 0.76±0.03  | 0.22±0.10        | 0.11±0.07 | 0.02±0.06  | 0.08±0.06          | 0.94±0.04          |
|                  | SVM               | 0.79±0.00  | 0.00±0.00        | 0.00±0.00 | 0.00±0.00  | 0.00±0.00          | 1.00±0.00          |
|                  | GCN               | 0.81±0.01  | 0.62±0.02        | 0.29±0.04 | 0.26±0.02  | 0.19±0.04          | 0.97±0.01          |
| External Test    | DT                | 0.66±0.03  | 0.25±0.02        | 0.27±0.05 | 0.05±0.04  | 0.30±0.10          | 0.75±0.06          |
|                  | GNB               | 0.60±0.07  | 0.27±0.04        | 0.34±0.04 | 0.10±0.05  | 0.49±0.13          | 0.63±0.12          |
|                  | K-NEST            | 0.77±0.01  | 0.37±0.06        | 0.17±0.07 | 0.10±0.04  | 0.12±0.06          | 0.94±0.03          |
|                  | LR                | 0.79±0.00  | 0.00±0.00        | 0.00±0.00 | 0.00±0.00  | 0.00±0.00          | 1.00±0.00          |
|                  | RF                | 0.76±0.02  | 0.27±0.07        | 0.11±0.08 | 0.03±0.05  | 0.08±0.07          | 0.94±0.04          |
|                  | SVM               | 0.79±0.00  | 0.00±0.00        | 0.00±0.00 | 0.00±0.00  | 0.00±0.00          | 1.00±0.00          |
|                  | GCN               | 0.80±0.00  | 0.62±0.02        | 0.29±0.06 | 0.26±0.03  | 0.19±0.05          | 0.97±0.01          |

The values in the table are the mean values and standard deviation are from the 5-fold cross-validation.

Supplementary Table 5: Classification results based on BLAST on datasets of All-Pfam and App-Pfam

| Dataset  | E-value | Acc  | Precision | F1   | Mcc   | Sensitivity | Specificity |
|----------|---------|------|-----------|------|-------|-------------|-------------|
| All-Pfam | e-3     | 0.30 | 0.81      | 0.43 | -0.39 | 0.00        | 0.81        |
|          | e-6     | 0.28 | 0.84      | 0.42 | -0.35 | 0.00        | 0.84        |
|          | e-10    | 0.27 | 0.86      | 0.41 | -0.33 | 0.00        | 0.86        |
| App-Pfam | e-3     | 0.17 | 0.78      | 0.27 | -0.43 | 0.00        | 0.78        |
|          | e-6     | 0.16 | 0.82      | 0.27 | -0.39 | 0.00        | 0.82        |
|          | e-10    | 0.16 | 0.84      | 0.26 | -0.37 | 0.00        | 0.84        |

Supplementary Table 6: Classification results of 5-fold cross-validation on the datasets of *H. sapiens* in Figure 5

|                  | Dataset | Acc       | Precision | F1        | Mcc       | Sensitivity | Specificity |
|------------------|---------|-----------|-----------|-----------|-----------|-------------|-------------|
| Cross-validation | A+B     | 0.95±0.00 | 0.97±0.00 | 0.94±0.01 | 0.90±0.01 | 0.92±0.01   | 0.97±0.00   |
|                  | B+C     | 0.95±0.01 | 0.97±0.01 | 0.95±0.01 | 0.90±0.01 | 0.92±0.01   | 0.98±0.01   |
|                  | A+C     | 0.95±0.01 | 0.97±0.01 | 0.95±0.01 | 0.90±0.01 | 0.93±0.02   | 0.97±0.01   |

The values in the table are the mean values and standard deviation are from the 5-fold cross-validation.

Supplementary Table 7: The list of undeveloped drug target proteins in *H. sapiens* from our model

| UniProt ID | Weight   |
|------------|----------|------------|----------|------------|----------|------------|----------|
| P22749     | 0.974902 | P0DPI2     | 0.880529 | Q96MA6     | 0.709324 | P50395     | 0.566302 |
| P30085     | 0.974829 | P38117     | 0.879324 | Q14390     | 0.702568 | Q96JN8     | 0.56408  |
| Q14353     | 0.97479  | Q9Y6K8     | 0.877921 | P30040     | 0.698446 | Q9H1P3     | 0.561815 |
| P00568     | 0.974782 | O95433     | 0.87548  | P36268     | 0.688868 | Q9Y3C7     | 0.561717 |
| P22061     | 0.974778 | A0A0B4J2D5 | 0.874937 | Q16134     | 0.678327 | Q6ZV89     | 0.561366 |
| Q8IVH4     | 0.974714 | Q8TB22     | 0.866978 | Q96GG9     | 0.675535 | Q9BZF2     | 0.557529 |
| O95865     | 0.974699 | P46777     | 0.866216 | O75365     | 0.660316 | Q2Y0W8     | 0.5571   |
| Q86Y39     | 0.974695 | Q02878     | 0.861963 | Q7KZN9     | 0.65383  | Q15435     | 0.55285  |
| Q05932     | 0.974678 | Q8NBJ7     | 0.861302 | P60059     | 0.652227 | Q9BX51     | 0.552098 |
| Q92506     | 0.974668 | P0CG22     | 0.859744 | Q5TA45     | 0.651076 | Q9HBB8     | 0.55052  |
| Q9Y234     | 0.974643 | P22087     | 0.856953 | O60507     | 0.649644 | Q6P988     | 0.548566 |
| Q9BTZ2     | 0.974618 | Q9BPX1     | 0.849202 | Q9NY12     | 0.640061 | Q8IXN7     | 0.548503 |
| P02818     | 0.974602 | A0A075B6L2 | 0.84816  | A6NHQ2     | 0.63703  | Q8WWA0     | 0.543998 |
| P51161     | 0.974543 | Q13268     | 0.840222 | O00767     | 0.635873 | Q99571     | 0.543037 |
| Q6NUM9     | 0.974536 | P0DTE2     | 0.837805 | Q9Y5Z7     | 0.635163 | B5MD39     | 0.539385 |
| Q8WVQ1     | 0.974515 | Q2TBF2     | 0.836365 | Q00005     | 0.63295  | Q86Y79     | 0.537537 |
| Q6N063     | 0.973995 | Q9NQ11     | 0.835728 | Q9Y2T4     | 0.631297 | O95825     | 0.537398 |
| P19404     | 0.973749 | A6NGU5     | 0.83498  | A3KN83     | 0.630856 | P63173     | 0.53619  |
| O94760     | 0.973668 | Q5VTL7     | 0.832507 | Q5TC63     | 0.628693 | P54840     | 0.534449 |
| Q7Z4W1     | 0.9734   | O00625     | 0.822298 | O60704     | 0.628103 | Q9Y693     | 0.532006 |
| P50440     | 0.973379 | Q9NPF4     | 0.803374 | Q6NXG1     | 0.625893 | P23511     | 0.53034  |
| P19440     | 0.973303 | Q9Y237     | 0.799958 | Q9BS92     | 0.61443  | Q9H299     | 0.530029 |
| P78559     | 0.973235 | A6NEY8     | 0.796118 | Q06203     | 0.61165  | Q9NR22     | 0.529451 |
| P15502     | 0.972725 | Q5W064     | 0.792034 | P62805     | 0.609764 | Q8NI37     | 0.52902  |
| P08590     | 0.949492 | Q96AT9     | 0.784862 | P51452     | 0.609156 | Q9BUE6     | 0.527773 |
| P12829     | 0.949006 | P49326     | 0.782469 | Q9BY49     | 0.608191 | Q9HAT2     | 0.52768  |
| Q8TDX5     | 0.947522 | Q9Y5T4     | 0.774123 | A5YM72     | 0.607706 | Q6DKI1     | 0.526922 |
| P60660     | 0.941082 | Q15198     | 0.771987 | Q9Y282     | 0.606879 | Q96PE7     | 0.526015 |
| P14649     | 0.940274 | Q6UY09     | 0.767729 | Q9Y6R1     | 0.606444 | Q9H6T0     | 0.517768 |
| Q9BUT1     | 0.937981 | Q2QD12     | 0.76768  | Q92597     | 0.602533 | Q96FJ2     | 0.517127 |
| Q9HIK1     | 0.93696  | Q9HD20     | 0.764682 | Q9UHN6     | 0.600543 | Q9Y696     | 0.515069 |
| P07148     | 0.929724 | Q6JVE6     | 0.763513 | Q9UFN0     | 0.600139 | P46783     | 0.514568 |
| Q6P1N9     | 0.922464 | Q8ND71     | 0.751415 | Q8WUX2     | 0.595898 | Q9UGK3     | 0.513458 |
| Q13867     | 0.915804 | Q9HAV7     | 0.748875 | Q5HYK3     | 0.589915 | Q6PH85     | 0.512657 |
| P04632     | 0.91014  | Q9BY44     | 0.746898 | Q8IXL6     | 0.587731 | Q8N131     | 0.508171 |
| Q8N4T8     | 0.90646  | P36269     | 0.744304 | Q96BS2     | 0.584984 | Q13228     | 0.507639 |
| P13804     | 0.906407 | Q8NBK3     | 0.739423 | P18124     | 0.584575 | Q9Y215     | 0.505059 |
| Q9Y639     | 0.900539 | Q8WUR7     | 0.732628 | Q99460     | 0.58156  | Q9BUX1     | 0.502935 |
| P05976     | 0.887143 | P18077     | 0.71383  | O75175     | 0.580931 | Q9H3J6     | 0.50277  |
| P35613     | 0.886707 | P0DPI4     | 0.712282 | Q66LE6     | 0.580389 | Q86VZ6     | 0.501325 |
| Q16698     | 0.882575 | P32969     | 0.712167 | O95445     | 0.568671 | O75063     | 0.500905 |

Supplementary Table 8: Hyperparameters of traditional machine learning classification algorithms

| Algorithm           | Super parameters                                                                                                 |
|---------------------|------------------------------------------------------------------------------------------------------------------|
| Decision Tree       | Criterion = gini; splitter = best; max_depth = None;<br>min_samples_split = 2; min_samples_leaf = 1              |
| K-nearest Neighbor  | n_neighbors = 5; weights = uniform                                                                               |
| GaussianNB          | var_smoothingfloat = 1e-9                                                                                        |
| SVM                 | Regularization parameter = 1; kernel = rbf; degree = 3                                                           |
| Logistic Regression | penalty = l2                                                                                                     |
| Random Forest       | The number of trees = 100; Criterion = gini;<br>max_depth = None; min_samples_split = 2;<br>min_samples_leaf = 1 |

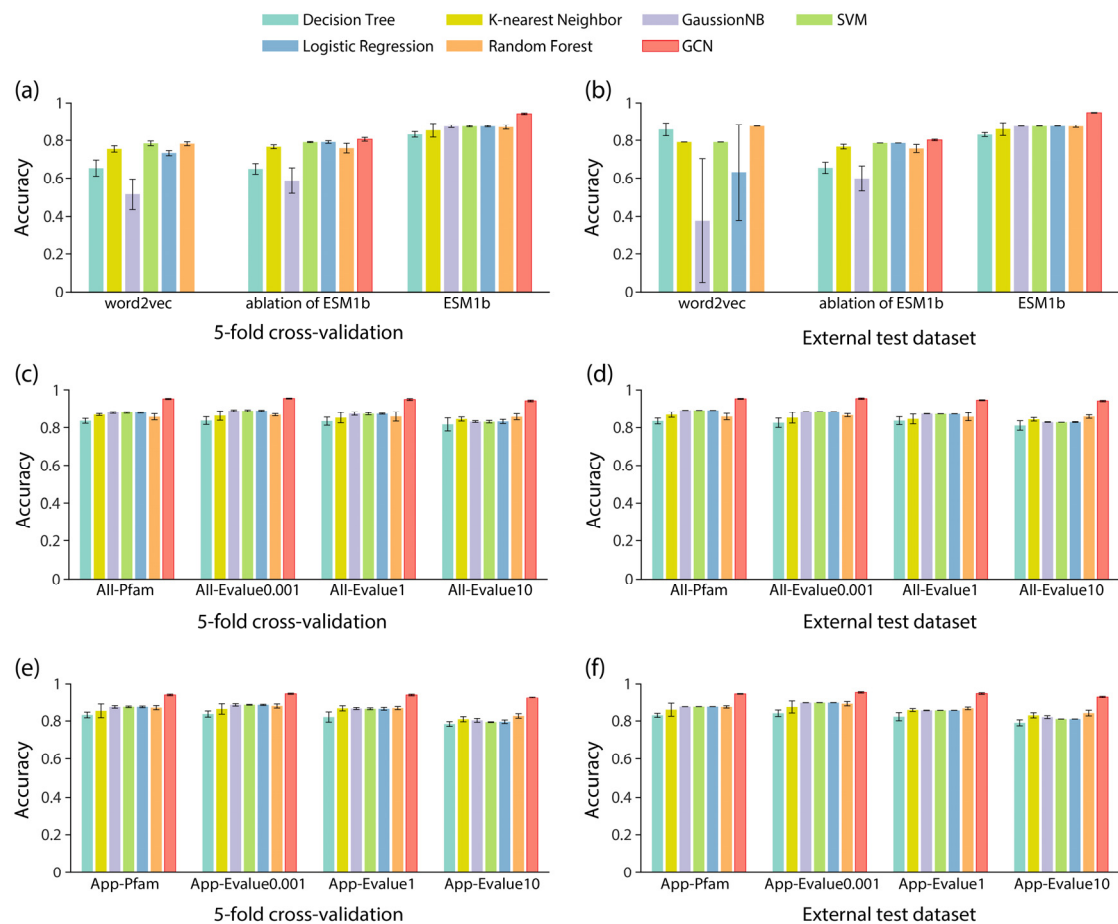

Supplementary Figure 1. Comparison of different protein encoding methods combined with different classification algorithms. (a) Classification results on 5-fold cross-validation with word2vec, randomly initialized ESM1b, and complete ESM1b protein-encoding, respectively. App-Pfam dataset was used for this analysis. (b) Data analyzed as in (a) but showing results from the external test dataset. (c) Classification results on 5-fold cross-validation with the different classification algorithms combined with ESM1b. Datasets of All-Pfam, All-Evalue0.001, All-Evalue1, and All-Evalue10 were used for this analysis. (d) Data analyzed as in (c) but showing results from the external test dataset. (e) Classification results on 5-fold cross-validation with the different classification algorithms combined with the protein-encoding method based on ESM1b. Datasets of App-Pfam, App-Evalue0.001, App-Evalue1, and App-Evalue10 were used for this analysis. (f) Data analyzed as in (e) but showing results from the external test dataset.



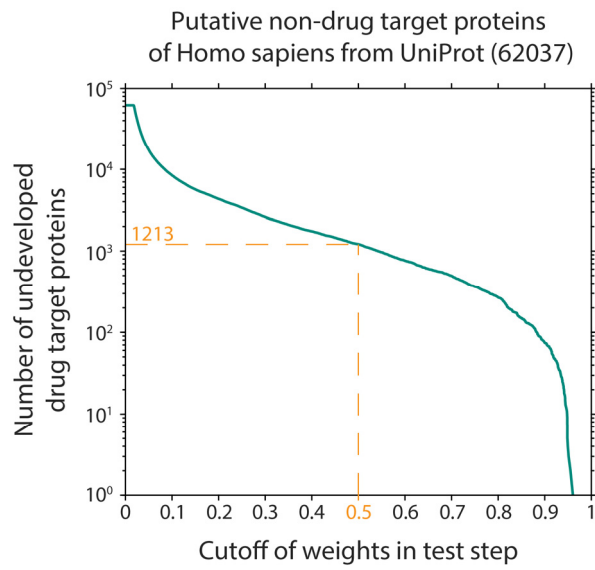

Supplementary Figure 2. Identification of undeveloped drug target proteins of Homo sapiens from big dataset. The number of proteins obtained by different cutoffs of weights in test step was shown.

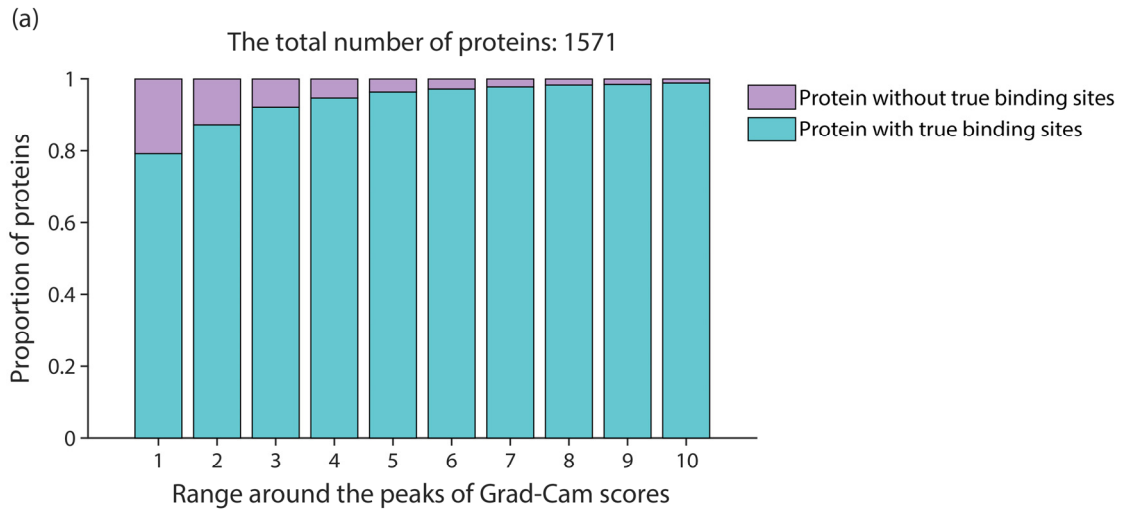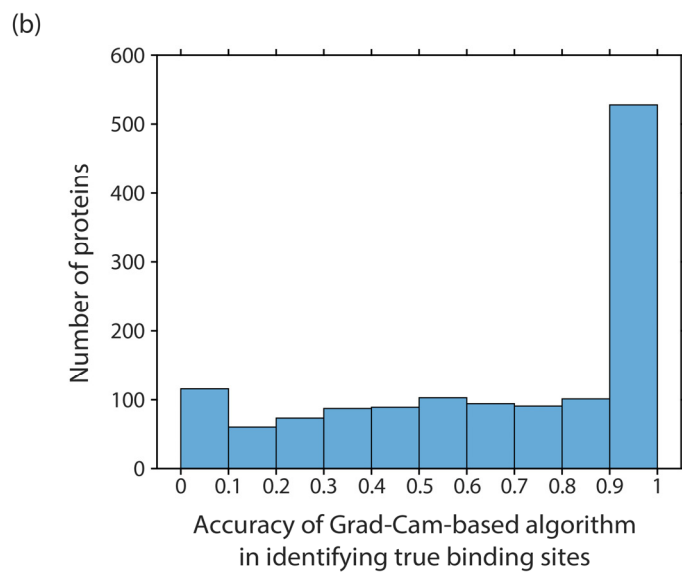

Supplementary Figure 3. Statistical of the results of Grad-Cam scoring on the whole dataset. (a) The horizontal axis represents the residue range around the peak of Grad-Cam scoring. The vertical axis represents the proportion of proteins that have the true binding site within this range around the scoring peaks. (b) To calculate the accuracy for a single protein, the denominator is the number of all true binding sites of the protein, and the numerator is the number of true binding sites successfully identified by the Grad-Cam-based algorithm. The criterion for successful identification was the presence of sites with a Grad-Cam score of more than 0.5 within a range of five amino acids in the vicinity of the binding site.

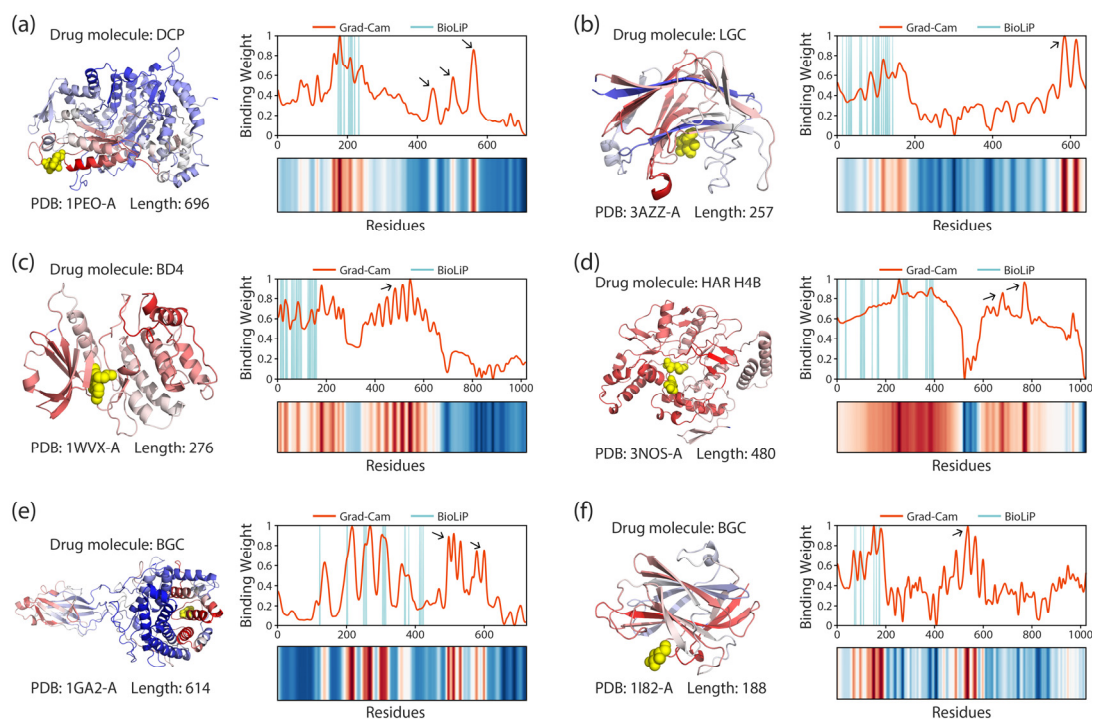

Supplementary Figure 4. Examples of potential drug molecule binding sites from Grad-Cam. (a) 3D conformation of protein 1PEO-A binding to drug molecule (left panel). Yellow spheres represent drug molecules. Color of the cartoon conformation represents the residue binding weight calculated by Grad-Cam. And comparison of residue binding weights calculated by Grad-Cam with experimentally confirmed binding sites from BioLip (right panel). Gaussian smoothing was performed for the residue binding weight curve. The black arrows indicate the locations with high Grad-Cam scores but no experimentally confirmed binding sites. (b-f) Same as (a) but showing the results of protein 3AZZ-A, 1WVX-A, 3NOS-A, 1GA2-A, 1I82-A, respectively.
